# Supplementary material
Source: MDPI journal article supplement (https://www.mdpi.com/2079-9292/12/21/4550)
Supplement: s1 [file s1]

## BCC Model Transfer Function Expressions

### Model №1: expression of the transfer function

$$\begin{aligned} & Kp = -zn * (-C2 * C1 * p^4 * L3 * C3 * L4 * C4 - \\ & C2 * C1 * p^3 * L3 * C3 * R4 * C4 - C2 * C1 * p^2 * L3 * C3 - \\ & C2 * C1 * R3 * p^3 * C3 * L4 * C4 - C2 * C1 * R3 * p^2 * C3 * R4 * C4 - \\ & C2 * C1 * R3 * p * C3 - C2 * C1 * p^2 * L4 * C4 - C2 * C1 * R4 * p * C4 - \\ & C2 * C1 + C3 * C4 * p^4 * L2 * C2 * L1 * C1 + C3 * C4 * p^3 * L2 * C2 * R1 * C1 + C \\ & 3 * C4 * p^2 * L2 * C2 + C3 * C4 * R2 * p^3 * C2 * L1 * C1 + C3 * C4 * R2 * p^2 * C \\ & 2 * R1 * C1 + C3 * C4 * R2 * p * C2 + C3 * C4 * p^2 * L1 * C1 + C3 * C4 * R1 * p * C1 \\ & + C3 * C4) * Rd3 * p / ( (C2 * p^4 * L3 * C3 * L4 * C4 + C2 * p^3 * L3 * C3 * R4 * \\ & C4 + C2 * R3 * p^3 * C3 * L4 * C4 + C2 * R3 * p^2 * C3 * R4 * C4 + C4 * R3 * p * C3 \\ & + C4 * R2 * p * C2 + C4 * p^2 * L1 * C1 + C4 * p^2 * L3 * C3 + C4 * p^2 * L2 * C2 + \\ & C4 * R1 * p * C1 + C3 * p^2 * L4 * C4 + C3 * R2 * p * C2 + C3 * p^2 * L1 * C1 + C3 * \\ & R4 * p * C4 + C3 * p^2 * L2 * C2 + C3 * R1 * p * C1 + C2 * p^2 * L1 * C1 + C2 * R1 * \\ & p * C1 + C1 * R3 * p * C3 + C1 * p^2 * L4 * C4 + C1 * R2 * p * C2 + C1 * p^2 * L3 * C \\ & 3 + C1 * R4 * p * C4 + C1 * p^2 * L2 * C2 + C1 + C2 + C3 + C2 * p^2 * L3 * C3 + C2 * \\ & p^2 * L4 * C4 + C2 * R3 * p * C3 + C2 * R4 * p * C4 + C4 + zn * p * C1 * C4 + zn * p^ \\ & 3 * C1 * C4 * L3 * C3 + zn * p^2 * C1 * C4 * R3 * C3 + zn * p^3 * C1 * C4 * L2 * C2 \\ & + zn * p^2 * C1 * C4 * R2 * C2 + zn * p * C3 * C2 + zn * p^3 * C3 * C2 * L1 * C1 + z \\ & n * p^2 * C3 * C2 * R1 * C1 + zn * p^3 * C3 * C2 * L4 * C4 + zn * p^2 * C3 * C2 * R \\ & 4 * C4 + zn * p * C3 * C4 + zn * p^3 * C3 * C4 * L2 * C2 + zn * p^2 * C3 * C4 * R2 * \\ & C2 + zn * p^3 * C3 * C4 * L1 * C1 + zn * p^2 * C3 * C4 * R1 * C1 + zn * p * C2 * C1 \\ & + zn * p^3 * C2 * C1 * L3 * C3 + zn * p^2 * C2 * C1 * R3 * C3 + zn * p^3 * C2 * C1 \\ & * L4 * C4 + zn * p^2 * C2 * C1 * R4 * C4 + C4 * p^4 * L2 * C2 * L1 * C1 + C4 * p^3 \\ & * L2 * C2 * R1 * C1 + C4 * R2 * p^3 * C2 * L1 * C1 + C4 * R2 * p^2 * C2 * R1 * C1 + \\ & C4 * p^4 * L3 * C3 * L2 * C2 + C4 * p^3 * L3 * C3 * R2 * C2 + C4 * R3 * p^3 * C3 * \\ & L2 * C2 + C4 * R3 * p^2 * C3 * R2 * C2 + C4 * p^4 * L1 * C1 * L3 * C3 + C4 * p^3 * \\ & L1 * C1 * R3 * C3 + C4 * R1 * p^3 * C1 * L3 * C3 + C4 * R1 * p^2 * C1 * R3 * C3 + C \\ & 3 * p^4 * L2 * C2 * L1 * C1 + C3 * p^3 * L2 * C2 * R1 * C1 + C3 * R2 * p^3 * C2 * L \\ & 1 * C1 + C3 * R2 * p^2 * C2 * R1 * C1 + C3 * p^4 * L1 * C1 * L4 * C4 + C3 * p^3 * L \\ & 1 * C1 * R4 * C4 + C3 * R1 * p^3 * C1 * L4 * C4 + C3 * R1 * p^2 * C1 * R4 * C4 + C3 \\ & * p^4 * L2 * C2 * L4 * C4 + C3 * p^3 * L2 * C2 * R4 * C4 + C3 * R2 * p^3 * C2 * L4 \\ & * C4 + C3 * R2 * p^2 * C2 * R4 * C4 + C2 * p^4 * L1 * C1 * L4 * C4 + C2 * p^3 * L1 \\ & * C1 * R4 * C4 + C2 * R1 * p^3 * C1 * L4 * C4 + C2 * R1 * p^2 * C1 * R4 * C4 + C2 * \\ & p^4 * L1 * C1 * L3 * C3 + C2 * p^3 * L1 * C1 * R3 * C3 + C2 * R1 * p^3 * C1 * L3 * \\ & C3 + C2 * R1 * p^2 * C1 * R3 * C3 + C1 * p^4 * L3 * C3 * L4 * C4 + C1 * p^3 * L3 * \end{aligned}$$

$$\begin{aligned}
& C3*R4*C4+C1*R3*p^3*C3*L4*C4+C1*R3*p^2*C3*R4*C4+C1*p \\
& ^4*L3*C3*L2*C2+C1*p^3*L3*C3*R2*C2+C1*R3*p^3*C3*L2*C \\
& 2+C1*R3*p^2*C3*R2*C2+C1*p^4*L2*C2*L4*C4+C1*p^3*L2*C \\
& 2*R4*C4+C1*R2*p^3*C2*L4*C4+C1*R2*p^2*C2*R4*C4+zn*p^ \\
& 5*C1*C4*L3*C3*L2*C2+zn*p^4*C1*C4*L3*C3*R2*C2+zn*p^4 \\
& *C1*C4*R3*C3*L2*C2+zn*p^3*C1*C4*R3*C3*R2*C2+zn*p^5* \\
& C3*C2*L1*C1*L4*C4+zn*p^4*C3*C2*L1*C1*R4*C4+zn*p^4*C \\
& 3*C2*R1*C1*L4*C4+zn*p^3*C3*C2*R1*C1*R4*C4+zn*p^5*C3 \\
& *C4*L2*C2*L1*C1+zn*p^4*C3*C4*L2*C2*R1*C1+zn*p^4*C3* \\
& C4*R2*C2*L1*C1+zn*p^3*C3*C4*R2*C2*R1*C1+zn*p^5*C2*C \\
& 1*L3*C3*L4*C4+zn*p^4*C2*C1*L3*C3*R4*C4+zn*p^4*C2*C1 \\
& *R3*C3*L4*C4+zn*p^3*C2*C1*R3*C3*R4*C4+C4*p^6*L2*C2* \\
& L1*C1*L3*C3+C4*p^5*L2*C2*L1*C1*R3*C3+C4*p^5*L2*C2*R \\
& 1*C1*L3*C3+C4*p^4*L2*C2*R1*C1*R3*C3+C4*R2*p^5*C2*L1 \\
& *C1*L3*C3+C4*R2*p^4*C2*L1*C1*R3*C3+C4*R2*p^4*C2*R1* \\
& C1*L3*C3+C4*R2*p^3*C2*R1*C1*R3*C3+C3*p^6*L2*C2*L1*C \\
& 1*L4*C4+C3*p^5*L2*C2*L1*C1*R4*C4+C3*p^5*L2*C2*R1*C1 \\
& *L4*C4+C3*p^4*L2*C2*R1*C1*R4*C4+C3*R2*p^5*C2*L1*C1* \\
& L4*C4+C3*R2*p^4*C2*L1*C1*R4*C4+C3*R2*p^4*C2*R1*C1*L \\
& 4*C4+C3*R2*p^3*C2*R1*C1*R4*C4+C2*p^6*L1*C1*L3*C3*L4 \\
& *C4+C2*p^5*L1*C1*L3*C3*R4*C4+C2*R1*p^5*C1*L3*C3*L4* \\
& C4+C2*R1*p^4*C1*L3*C3*R4*C4+C2*p^5*L1*C1*R3*C3*L4*C \\
& 4+C2*p^4*L1*C1*R3*C3*R4*C4+C2*R1*p^4*C1*R3*C3*L4*C4 \\
& +C2*R1*p^3*C1*R3*C3*R4*C4+C1*p^6*L3*C3*L2*C2*L4*C4+ \\
& C1*p^5*L3*C3*L2*C2*R4*C4+C1*p^5*L3*C3*R2*C2*L4*C4+C \\
& 1*p^4*L3*C3*R2*C2*R4*C4+C1*R3*p^5*C3*L2*C2*L4*C4+C1 \\
& *R3*p^4*C3*L2*C2*R4*C4+C1*R3*p^4*C3*R2*C2*L4*C4+C1* \\
& R3*p^3*C3*R2*C2*R4*C4) * (Rd1+Rd2+Rd3) ) ;
\end{aligned}$$

where  $p=jw$

### ***Model №2: expression of the transfer function***

$$\begin{aligned}
Kp = & p * (R1*p*C1*C2+p^2*L1*C1*C2+C2+R2*p*C1*C2+p^2*L2* \\
& C1*C2+C1) * (R3*p*C3*C4+p^2*L3*C3*C4+C4+R4*p*C3*C4+p^ \\
& 2*L4*C3*C4+C3) * zn*Rd3 / ( (R3*p^5*C3*L4*C4*L2*C1*C2+p^ \\
& 4*L3*C3*L2*C1*C2+R3*p^3*C3*R4*C4*R1*C1*C2+R1*p^3*C1 \\
& *R2*C2*R3*C3*C4+R1*p^4*C1*R2*C2*L3*C3*C4+R1*p^3*C1* \\
& R2*C2*R4*C3*C4+R1*p^4*C1*R2*C2*L4*C3*C4+R1*p^4*C1*L
\end{aligned}$$

$$\begin{aligned}
& 2 * C2 * R3 * C3 * C4 + p^5 * L3 * C3 * L4 * C4 * R2 * C1 * C2 + R3 * p * C3 * C1 + p \\
& ^2 * L3 * C3 * C2 + p^2 * L3 * C3 * C1 + R4 * p * C4 * C2 + R4 * p * C4 * C1 + p^2 * \\
& L4 * C4 * C2 + p^2 * L4 * C4 * C1 + R1 * p^5 * C1 * L2 * C2 * L3 * C3 * C4 + R1 * p \\
& ^4 * C1 * L2 * C2 * R4 * C3 * C4 + p^4 * L4 * C4 * L1 * C1 * C2 + p^4 * L1 * C1 * R \\
& 2 * C2 * R4 * C3 * C4 + p^5 * L1 * C1 * R2 * C2 * L4 * C3 * C4 + p^5 * L1 * C1 * R2 \\
& * C2 * L3 * C3 * C4 + R1 * p^5 * C1 * L2 * C2 * L4 * C3 * C4 + p^4 * L1 * C1 * R2 * \\
& C2 * R3 * C3 * C4 + p^5 * L1 * C1 * L2 * C2 * R4 * C3 * C4 + p^5 * L1 * C1 * L2 * C \\
& 2 * R3 * C3 * C4 + p^6 * L1 * C1 * L2 * C2 * L3 * C3 * C4 + C1 + zn * p^3 * C2 * L3 \\
& * C3 * C4 + p^6 * L3 * C3 * L4 * C4 * L1 * C1 * C2 + zn * p^4 * R1 * C1 * C2 * L3 * \\
& C3 * C4 + zn * p^3 * R1 * C1 * C2 * R4 * C3 * C4 + p^6 * L1 * C1 * L2 * C2 * L4 * C \\
& 3 * C4 + zn * p^3 * R1 * C1 * C2 * R3 * C3 * C4 + zn * p^5 * L1 * C1 * C2 * L3 * C3 \\
& * C4 + zn * p^4 * L1 * C1 * C2 * R4 * C3 * C4 + zn * p^4 * R1 * C1 * C2 * L4 * C3 * \\
& C4 + zn * p^4 * L1 * C1 * C2 * R3 * C3 * C4 + C3 + C4 + zn * p^5 * L1 * C1 * C2 * L \\
& 4 * C3 * C4 + zn * p^3 * R2 * C1 * C2 * R3 * C3 * C4 + C2 + zn * p^4 * R2 * C1 * C2 \\
& * L3 * C3 * C4 + zn * p^3 * R2 * C1 * C2 * R4 * C3 * C4 + zn * p^5 * L2 * C1 * C2 * \\
& L4 * C3 * C4 + zn * p^5 * L2 * C1 * C2 * L3 * C3 * C4 + zn * p^4 * L2 * C1 * C2 * R \\
& 4 * C3 * C4 + zn * p^4 * R2 * C1 * C2 * L4 * C3 * C4 + zn * p^4 * L2 * C1 * C2 * R3 \\
& * C3 * C4 + R2 * p * C2 * C4 + R2 * p * C2 * C3 + p^2 * L2 * C2 * C4 + p^2 * L1 * C1 \\
& * C2 + p^5 * L3 * C3 * R4 * C4 * L2 * C1 * C2 + zn * p^2 * C2 * R3 * C3 * C4 + R1 * \\
& p * C1 * C3 + p^2 * L1 * C1 * C4 + p^2 * L1 * C1 * C3 + p^3 * L4 * C4 * R1 * C1 * C \\
& 2 + R4 * p^3 * C4 * L2 * C1 * C2 + R4 * p^2 * C4 * R2 * C1 * C2 + R4 * p^3 * C4 * L \\
& 1 * C1 * C2 + R2 * p^2 * C2 * R4 * C3 * C4 + R2 * p^3 * C2 * L4 * C3 * C4 + p^3 * L \\
& 2 * C2 * R3 * C3 * C4 + p^4 * L2 * C2 * L3 * C3 * C4 + p^3 * L2 * C2 * R4 * C3 * C4 \\
& + p^4 * L2 * C2 * L4 * C3 * C4 + zn * p^2 * R1 * C1 * C2 * C4 + zn * p^2 * R1 * C1 \\
& * C2 * C3 + zn * p^3 * L1 * C1 * C2 * C4 + zn * p^3 * L1 * C1 * C2 * C3 + zn * p^2 \\
& * C2 * R4 * C3 * C4 + zn * p^3 * C2 * L4 * C3 * C4 + zn * p^2 * R2 * C1 * C2 * C4 + \\
& zn * p^2 * R2 * C1 * C2 * C3 + zn * p^3 * L2 * C1 * C2 * C4 + zn * p^3 * L2 * C1 * \\
& C2 * C3 + zn * p^2 * C1 * R3 * C3 * C4 + zn * p^3 * C1 * L3 * C3 * C4 + zn * p^2 * \\
& C1 * R4 * C3 * C4 + zn * p^3 * C1 * L4 * C3 * C4 + R3 * p^2 * C3 * R4 * C4 * C2 + R \\
& 3 * p^2 * C3 * R4 * C4 * C1 + R3 * p^3 * C3 * L4 * C4 * C2 + R3 * p^3 * C3 * L4 * C \\
& 4 * C1 + R3 * p^2 * C3 * R1 * C1 * C2 + R3 * p^3 * C3 * L1 * C1 * C2 + R3 * p^2 * C \\
& 3 * R2 * C1 * C2 + R3 * p^3 * C3 * L2 * C1 * C2 + p^3 * L3 * C3 * R4 * C4 * C2 + p^ \\
& 3 * L3 * C3 * R4 * C4 * C1 + p^4 * L3 * C3 * L4 * C4 * C2 + p^4 * L3 * C3 * L4 * C4 \\
& * C1 + p^3 * L3 * C3 * R1 * C1 * C2 + p^4 * L3 * C3 * L1 * C1 * C2 + p^3 * L3 * C3 \\
& * R2 * C1 * C2 + R4 * p^2 * C4 * R1 * C1 * C2 + R1 * p^3 * C1 * L3 * C3 * C4 + R1 * \\
& p^2 * C1 * R4 * C3 * C4 + R1 * p^3 * C1 * L4 * C3 * C4 + p^3 * L1 * C1 * R2 * C2 * \\
& C4 + p^3 * L1 * C1 * R2 * C2 * C3 + p^4 * L1 * C1 * L2 * C2 * C4 + p^4 * L1 * C1 * \\
& L2 * C2 * C3 + p^3 * L1 * C1 * R3 * C3 * C4 + p^4 * L1 * C1 * L3 * C3 * C4 + p^3 * \\
& L1 * C1 * R4 * C3 * C4 + p^4 * L1 * C1 * L4 * C3 * C4 + R2 * p^2 * C2 * R3 * C3 * C \\
& 4 + R2 * p^3 * C2 * L3 * C3 * C4 + R1 * p^2 * C1 * R2 * C2 * C4 + p^3 * L4 * C4 * R
\end{aligned}$$

$$\begin{aligned}
& 2 * C1 * C2 + zn * p * C1 * C4 + zn * p * C1 * C3 + R3 * p * C3 * C2 + R3 * p^4 * C3 * \\
& L4 * C4 * R2 * C1 * C2 + p^4 * L3 * C3 * R4 * C4 * R1 * C1 * C2 + p^4 * L4 * C4 * L \\
& 2 * C1 * C2 + R3 * p^4 * C3 * R4 * C4 * L1 * C1 * C2 + p^2 * L4 * C3 * C4 + p^2 * L \\
& 3 * C3 * C4 + R2 * p * C1 * C2 + R1 * p * C1 * C2 + p^2 * L2 * C1 * C2 + R3 * p^5 * C \\
& 3 * L4 * C4 * L1 * C1 * C2 + R3 * p^4 * C3 * R4 * C4 * L2 * C1 * C2 + p^5 * L3 * C3 \\
& * R4 * C4 * L1 * C1 * C2 + p^4 * L3 * C3 * R4 * C4 * R2 * C1 * C2 + R3 * p^3 * C3 * \\
& R4 * C4 * R2 * C1 * C2 + p^5 * L3 * C3 * L4 * C4 * R1 * C1 * C2 + R3 * p^4 * C3 * L \\
& 4 * C4 * R1 * C1 * C2 + R3 * p * C3 * C4 + R4 * p * C3 * C4 + R1 * p * C1 * C4 + p^2 * \\
& L2 * C2 * C3 + zn * p * C2 * C4 + zn * p * C2 * C3 + p^6 * L3 * C3 * L4 * C4 * L2 * C \\
& 1 * C2 + R1 * p^2 * C1 * R3 * C3 * C4 + R1 * p^3 * C1 * L2 * C2 * C3 + R1 * p^3 * C \\
& 1 * L2 * C2 * C4 + R1 * p^2 * C1 * R2 * C2 * C3) * (Rd1 + Rd2 + Rd3) );
\end{aligned}$$

where  $p = j\omega$
